# Supplementary material for: HRCM: An Efficient Hybrid Referential Compression Method for Genomic Big Data
Source: Hindawi journal article supplement (doi:10.1155/2019/3108950), 2019-11-16
Supplement: f1 [file 3108950.f1.pdf]

# HRCM

## Supplementary Material

### Contents

|                                                                      |    |
|----------------------------------------------------------------------|----|
| 1 Algorithms .....                                                   | 2  |
| 2 Data sets .....                                                    | 3  |
| 2.1 Details of H.sapiens data sets and other species data sets ..... | 3  |
| 2.2 The 1000 Genomes Project data sets .....                         | 4  |
| 2.3 The DNA sequence corpus .....                                    | 4  |
| 3 Additional experiments and results .....                           | 5  |
| 4 References .....                                                   | 15 |

# 1 Algorithms

---

**Algorithm 1** Reference file information extraction

---

**Input:** reference file:  $r\_file$ , reference file character number:  $m_r$ ;

- 1: Remove the first line of the file;
- 2: **for**  $i = 0$  to  $m_r$  **do**
- 3:     **if**  $r\_file[i]$  = lowercase **then**
- 4:          $r\_file[i] = \text{toupper}(r\_file[i])$ ;
- 5:         record the lowercase character position and length as tuple ( $position, length$ );
- 6:     **end if**
- 7:     **if**  $r\_file[i] \in [A, C, G, T]$  **then**
- 8:          $r\_seq[j] = r\_file[i]$ ;
- 9:     **else**
- 10:          $r\_file[i]$  is ignored;
- 11:     **end if**
- 12: **end for**

**Output:** reference ACGT information; reference lowercase character information;

---

---

**Algorithm 2** To-be-compressed file information extraction

---

**Input:** to-be-compressed file:  $t\_file$ , to-be-compressed file character number:  $m_t$ ;

- 1: Read the first line of the file as  $identifier$ ;
- 2: Record the character number of one line as  $line\_width$ ;
- 3: **for**  $i = 0$  to  $m_t$  **do**
- 4:     **if**  $t\_file [i]$  = lowercase **then**
- 5:          $t\_file[i] = \text{toupper}(t\_file[i])$ ;
- 6:         record the lowercase character position and length as tuple ( $position, length$ );
- 7:     **end if**
- 8:     **if**  $t\_file[i] \in [A, C, G, T]$  **then**
- 9:          $t\_seq[j] = t\_file[i]$ ;
- 10:     **else if**  $t\_file[i] = 'N'$  **then**
- 11:         record the N character position and length as tuple ( $position, length$ );
- 12:     **else if**  $t\_file[i] =$  special character **then**
- 13:         record the special character information as tuple ( $position, character$ );
- 14:     **end if**
- 15: **end for**

**Output:** to-be-compressed ACGT information; to-be-compressed lowercase character information; other information such as  $identifier$ ,  $line\_width$ , N character information and special character information

---

## 2 Data sets

### 2.1 Details of H.sapiens data sets and other species data sets

Table 1: Details of genome data sets used in the experiments

| Species                | Data sets   | Number of Chromosomes | Size               | Retrieved from                                                                                                                                                                                                                                      |
|------------------------|-------------|-----------------------|--------------------|-----------------------------------------------------------------------------------------------------------------------------------------------------------------------------------------------------------------------------------------------------|
| H.sapiens              | hg13        | 24                    | 2967.55            | <a href="ftp://hgdownload.soe.ucsc.edu/goldenPath/hg13/chromosomes/">ftp://hgdownload.soe.ucsc.edu/goldenPath/hg13/chromosomes/</a>                                                                                                                 |
|                        | hg16        | 24                    | 2986.53            | <a href="ftp://hgdownload.soe.ucsc.edu/goldenPath/hg16/chromosomes/">ftp://hgdownload.soe.ucsc.edu/goldenPath/hg16/chromosomes/</a>                                                                                                                 |
|                        | hg17        | 24                    | 2992.98            | <a href="ftp://hgdownload.soe.ucsc.edu/goldenPath/hg17/chromosomes/">ftp://hgdownload.soe.ucsc.edu/goldenPath/hg17/chromosomes/</a>                                                                                                                 |
|                        | hg18        | 24                    | 2996.52            | <a href="ftp://hgdownload.soe.ucsc.edu/goldenPath/hg18/chromosomes/">ftp://hgdownload.soe.ucsc.edu/goldenPath/hg18/chromosomes/</a>                                                                                                                 |
|                        | hg19        | 24                    | 3011.38            | <a href="ftp://hgdownload.soe.ucsc.edu/goldenPath/hg19/chromosomes/">ftp://hgdownload.soe.ucsc.edu/goldenPath/hg19/chromosomes/</a>                                                                                                                 |
|                        | hg38        | 24                    | 2996.52            | <a href="ftp://hgdownload.soe.ucsc.edu/goldenPath/hg38/chromosomes/">ftp://hgdownload.soe.ucsc.edu/goldenPath/hg38/chromosomes/</a>                                                                                                                 |
|                        | K131        | 24                    | 2986.77            | <a href="ftp://ftp.kobic.re.kr/pub/KOBIC-KoreanGenome/KOREF_20090131/fasta/">ftp://ftp.kobic.re.kr/pub/KOBIC-KoreanGenome/KOREF_20090131/fasta/</a>                                                                                                 |
|                        | K224        | 24                    | 2986.75            | <a href="ftp://ftp.kobic.re.kr/pub/KOBIC-KoreanGenome/KOREF_20090224/fasta/">ftp://ftp.kobic.re.kr/pub/KOBIC-KoreanGenome/KOREF_20090224/fasta/</a>                                                                                                 |
|                        | YH<br>HuRef | 24<br>24              | 2986.75<br>2993.95 | <a href="ftp://public.genomics.org.cn/BGI/yanhuang/fa/">ftp://public.genomics.org.cn/BGI/yanhuang/fa/</a><br><a href="https://www.ncbi.nlm.nih.gov/nucleotide/">https://www.ncbi.nlm.nih.gov/nucleotide/</a><br>Accession:CM000462-CM000485         |
| Arabidopsis thaliana   | TAIR9       | 7                     | 115.62             | <a href="ftp://ftp.arabidopsis.org/home/tair/Sequences/whole_chromosomes/">ftp://ftp.arabidopsis.org/home/tair/Sequences/whole_chromosomes/</a>                                                                                                     |
|                        | TAIR10      | 7                     | 115.59             | <a href="ftp://ftp.arabidopsis.org/home/tair/Sequences/whole_chromosomes/OLD/">ftp://ftp.arabidopsis.org/home/tair/Sequences/whole_chromosomes/OLD/</a>                                                                                             |
| Caenorhabditis elegans | ce6         | 7                     | 97.56              | <a href="ftp://hgdownload.soe.ucsc.edu/goldenPath/ce6/chromosomes/">ftp://hgdownload.soe.ucsc.edu/goldenPath/ce6/chromosomes/</a>                                                                                                                   |
|                        | ce10        | 7                     | 97.57              | <a href="ftp://hgdownload.soe.ucsc.edu/goldenPath/ce10/chromosomes/">ftp://hgdownload.soe.ucsc.edu/goldenPath/ce10/chromosomes/</a>                                                                                                                 |
|                        | ce11        | 7                     | 97.57              | <a href="ftp://hgdownload.soe.ucsc.edu/goldenPath/ce11/chromosomes/">ftp://hgdownload.soe.ucsc.edu/goldenPath/ce11/chromosomes/</a>                                                                                                                 |
| Oryza sativa           | TIGR5.0     | 12                    | 360.79             | <a href="http://rice.plantbiology.msu.edu/pub/data/Eukaryotic_Projects/o_sativa/annotation_dbs/pseudomolecules/version_5.0/">http://rice.plantbiology.msu.edu/pub/data/Eukaryotic_Projects/o_sativa/annotation_dbs/pseudomolecules/version_5.0/</a> |
|                        | TIGR6.0     | 12                    | 361.01             | <a href="http://rice.plantbiology.msu.edu/pub/data/Eukaryotic_Projects/o_sativa/annotation_dbs/pseudomolecules/version_6.0/">http://rice.plantbiology.msu.edu/pub/data/Eukaryotic_Projects/o_sativa/annotation_dbs/pseudomolecules/version_6.0/</a> |

|                          |         |    |        |                                                                                                                                                                                                                                                     |
|--------------------------|---------|----|--------|-----------------------------------------------------------------------------------------------------------------------------------------------------------------------------------------------------------------------------------------------------|
|                          | TIGR7.0 | 12 | 361.91 | <a href="http://rice.plantbiology.msu.edu/pub/data/Eukaryotic_Projects/o_sativa/annotation_dbs/pseudomolecules/version_7.0/">http://rice.plantbiology.msu.edu/pub/data/Eukaryotic_Projects/o_sativa/annotation_dbs/pseudomolecules/version_7.0/</a> |
| Saccharomyces cerevisiae | sacCer2 | 17 | 11.86  | <a href="ftp://hgdownload.soe.ucsc.edu/goldenPath/sacCer2/chromosomes/">ftp://hgdownload.soe.ucsc.edu/goldenPath/sacCer2/chromosomes/</a>                                                                                                           |
|                          | SacCer3 | 17 | 11.86  | <a href="ftp://hgdownload.soe.ucsc.edu/goldenPath/sacCer3/chromosomes/">ftp://hgdownload.soe.ucsc.edu/goldenPath/sacCer3/chromosomes/</a>                                                                                                           |

## 2.2 The 1000 Genomes Project data sets

The 1000 Genomes Project data sets were retrieved based on the VCF files downloaded from 1000GP FTP server and the script `vcf2fasta` provided by GDC2 [1].

The reference sequences of assembled chromosomes can be downloaded from:  
[ftp://ftp.ncbi.nlm.nih.gov/genomes/H\\_sapiens/Assembled\\_chromosomes/seq/](ftp://ftp.ncbi.nlm.nih.gov/genomes/H_sapiens/Assembled_chromosomes/seq/)

The VCF files can be downloaded from:  
[ftp://ftp.ncbi.nlm.nih.gov/1000genomes/ftp/phase1/analysis\\_results/integrated\\_call\\_sets/](ftp://ftp.ncbi.nlm.nih.gov/1000genomes/ftp/phase1/analysis_results/integrated_call_sets/)

The details of how to use the reference sequences and the VCF files to retrieve the FASTA files are shown in the supplementary material of GDC2.

## 2.3 The DNA sequence corpus

The data sets can be downloaded from:  
<https://tinyurl.com/DNAcorpus>

More details can refer to the reference [2].

### 3 Additional experiments and results

Table 2: Detailed compressed sizes by HRCM-S and other methods on the eight benchmark human genomes

| Reference | To-be-compressed | Original file size (MB) | Compressed size (MB) by |        |        |        |       |              |              |
|-----------|------------------|-------------------------|-------------------------|--------|--------|--------|-------|--------------|--------------|
|           |                  |                         | iDoComp                 | GDC2   | ERGC   | NRGC   | HiRGC | SCCG         | HRCM-S       |
| hg17      | hg18             | 2,996.52                | <b>3.37</b>             | 11.71  | 171.85 | 160.54 | 10.34 | 10.30        | 4.24         |
|           | hg19             | 3,011.38                | <b>8.23</b>             | 34.71  | 379.96 | 245.32 | 11.65 | 11.57        | 9.32         |
|           | hg38             | 3,004.16                | 29.59                   | 70.60  | 580.98 | 679.55 | 19.70 | <b>19.46</b> | 20.60        |
|           | K131             | 2,986.77                | 180.94                  | 388.11 | 175.11 | 197.83 | 18.73 | <b>14.22</b> | 19.60        |
|           | K224             | 2,986.75                | 118.30                  | 384.77 | 187.33 | 179.87 | 17.29 | <b>12.70</b> | 18.20        |
|           | YH               | 2,986.75                | 70.25                   | 379.57 | 202.92 | 172.17 | 13.24 | <b>8.66</b>  | 14.10        |
|           | HuRef            | 2,993.95                | 106.75                  | 301.48 | 522.71 | 316.76 | 12.67 | <b>12.18</b> | 13.60        |
| hg18      | hg17             | 2,992.98                | <b>2.26</b>             | 10.67  | 87.62  | 99.23  | 9.43  | 9.42         | 3.19         |
|           | hg19             | 3,011.38                | <b>6.20</b>             | 29.11  | 299.50 | 68.70  | 10.66 | 10.62        | 7.56         |
|           | hg38             | 3,004.16                | 28.11                   | 66.95  | 582.34 | 679.56 | 18.98 | <b>18.74</b> | 19.50        |
|           | K131             | 2,986.77                | 179.07                  | 389.41 | 13.51  | 56.99  | 17.79 | <b>12.91</b> | 18.50        |
|           | K224             | 2,986.75                | 116.14                  | 386.09 | 12.09  | 56.99  | 16.34 | <b>11.43</b> | 17.10        |
|           | YH               | 2,986.75                | 68.64                   | 381.00 | 7.90   | 39.54  | 12.28 | <b>7.60</b>  | 18.20        |
|           | HuRef            | 2,993.95                | 106.34                  | 301.66 | 495.26 | 236.85 | 11.79 | <b>11.33</b> | 12.50        |
| hg19      | hg17             | 2,992.98                | <b>6.17</b>             | 33.00  | 175.75 | 133.32 | 9.70  | 9.68         | 7.01         |
|           | hg18             | 2,996.52                | <b>5.26</b>             | 28.48  | 131.38 | 46.64  | 9.60  | 9.58         | 6.28         |
|           | hg38             | 3,004.16                | 24.14                   | 47.13  | 526.25 | 679.38 | 18.15 | 17.99        | <b>16.70</b> |
|           | K131             | 2,986.77                | 154.49                  | 402.17 | 247.19 | 91.03  | 18.00 | <b>13.67</b> | 18.80        |
|           | K224             | 2,986.75                | 193.85                  | 398.87 | 268.43 | 43.59  | 16.56 | <b>12.14</b> | 17.40        |
|           | YH               | 2,986.75                | 83.82                   | 394.09 | 190.87 | 34.04  | 12.50 | <b>7.94</b>  | 13.30        |
|           | HuRef            | 2,993.95                | 114.16                  | 306.63 | 286.90 | 151.25 | 11.05 | <b>10.57</b> | 11.40        |
| hg38      | hg17             | 2,992.98                | 11.76                   | 54.57  | 175.75 | 201.98 | 11.09 | 10.98        | <b>10.90</b> |
|           | hg18             | 2,996.52                | 11.46                   | 52.05  | 131.38 | 146.17 | 11.25 | 11.14        | <b>10.80</b> |
|           | hg19             | 3,011.38                | <b>8.45</b>             | 32.82  | 184.55 | 144.85 | 11.55 | 11.43        | 9.33         |
|           | K131             | 2,986.77                | 147.47                  | 407.10 | 342.37 | 167.75 | 19.41 | <b>15.07</b> | 20.40        |
|           | K224             | 2,986.75                | 167.59                  | 403.77 | 339.90 | 208.87 | 17.96 | <b>13.52</b> | 18.90        |
|           | YH               | 2,986.75                | 73.55                   | 398.54 | 266.78 | 177.23 | 13.97 | <b>9.37</b>  | 15.00        |
|           | HuRef            | 2,993.95                | 106.71                  | 310.66 | 267.96 | 200.48 | 11.55 | <b>10.42</b> | 11.40        |
| K131      | hg17             | 2,992.98                | 225.68                  | 335.05 | 175.75 | 117.27 | 19.20 | <b>17.89</b> | 20.00        |
|           | hg18             | 2,996.52                | 227.07                  | 337.46 | 131.38 | 33.42  | 19.16 | <b>17.44</b> | 19.90        |
|           | hg19             | 3,011.38                | 353.14                  | 350.60 | 442.38 | 106.73 | 20.43 | <b>19.42</b> | 21.40        |
|           | hg38             | 3,004.16                | 330.88                  | 370.89 | 603.92 | 680.70 | 28.56 | <b>27.39</b> | 30.40        |
|           | K224             | 2,986.75                | 6.91                    | 16.18  | 4.73   | 7.86   | 8.88  | <b>4.45</b>  | 10.80        |
|           | YH               | 2,986.75                | 48.72                   | 40.82  | 8.78   | 23.04  | 13.09 | <b>7.82</b>  | 13.80        |
|           | HuRef            | 2,993.95                | 146.52                  | 119.45 | 507.21 | 203.14 | 14.88 | <b>14.12</b> | 16.20        |

|       |       |          |        |        |        |        |       |              |       |
|-------|-------|----------|--------|--------|--------|--------|-------|--------------|-------|
|       | hg17  | 2,992.98 | 232.61 | 331.57 | 175.75 | 117.24 | 19.12 | <b>17.81</b> | 19.90 |
|       | hg18  | 2,996.52 | 234.13 | 333.97 | 131.38 | 33.37  | 19.08 | <b>17.36</b> | 19.80 |
|       | hg19  | 3,011.38 | 321.95 | 347.21 | 443.20 | 106.78 | 20.35 | <b>19.34</b> | 21.30 |
| K224  | hg38  | 3,004.16 | 329.49 | 367.53 | 609.98 | 680.77 | 28.48 | <b>27.34</b> | 30.30 |
|       | K131  | 2,986.77 | 6.66   | 13.19  | 6.03   | 8.86   | 10.19 | <b>5.84</b>  | 12.40 |
|       | YH    | 2,986.75 | 28.68  | 34.49  | 8.68   | 22.60  | 12.97 | <b>7.72</b>  | 14.00 |
|       | HuRef | 2,993.95 | 130.68 | 112.96 | 522.93 | 203.03 | 14.77 | <b>14.03</b> | 16.00 |
|       | hg17  | 2,992.98 | 47.48  | 338.22 | 175.75 | 114.96 | 17.71 | <b>16.65</b> | 18.30 |
|       | hg18  | 2,996.52 | 47.45  | 340.66 | 131.38 | 30.82  | 17.63 | <b>16.34</b> | 18.20 |
|       | hg19  | 3,011.38 | 76.09  | 353.88 | 433.45 | 84.78  | 18.93 | <b>18.10</b> | 19.70 |
| YH    | hg38  | 3,004.16 | 99.58  | 434.66 | 580.58 | 680.34 | 27.13 | <b>26.11</b> | 28.80 |
|       | K131  | 2,986.77 | 19.19  | 42.58  | 12.63  | 28.88  | 17.13 | <b>12.00</b> | 17.60 |
|       | K224  | 2,986.75 | 46.00  | 38.24  | 11.21  | 27.44  | 15.64 | <b>10.50</b> | 16.50 |
|       | HuRef | 2,993.95 | 63.51  | 95.47  | 495.61 | 203.82 | 14.29 | <b>13.57</b> | 15.40 |
|       | hg17  | 2,992.98 | 98.38  | 274.07 | 175.75 | 303.90 | 19.97 | <b>19.17</b> | 20.60 |
|       | hg18  | 2,996.52 | 121.08 | 275.38 | 131.38 | 251.23 | 20.02 | <b>19.20</b> | 20.60 |
|       | hg19  | 3,011.38 | 152.13 | 280.34 | 464.86 | 231.16 | 20.31 | <b>19.56</b> | 20.70 |
| HuRef | hg38  | 3,004.16 | 230.50 | 300.76 | 586.02 | 673.91 | 26.62 | <b>25.82</b> | 28.00 |
|       | K131  | 2,986.77 | 83.87  | 135.09 | 519.18 | 301.08 | 21.84 | <b>17.42</b> | 22.90 |
|       | K224  | 2,986.75 | 81.38  | 130.05 | 503.13 | 287.62 | 20.34 | <b>15.84</b> | 21.40 |
|       | YH    | 2,986.75 | 56.80  | 105.78 | 531.57 | 246.98 | 17.05 | <b>12.32</b> | 18.30 |

Bold indicates the best value of the case.

Table 3: Detailed compressed sizes of each chromosome by HRCM-B on the eight benchmark human genomes

| Chromosome Number | Compressed size (MB) of each chromosome on different reference genomes |      |      |      |      |      |      |       |
|-------------------|------------------------------------------------------------------------|------|------|------|------|------|------|-------|
|                   | hg17                                                                   | hg18 | hg19 | hg38 | K131 | K224 | YH   | HuRef |
| Chr1              | 7.71                                                                   | 7.15 | 7.07 | 7.25 | 8.41 | 8.50 | 8.43 | 7.39  |
| Chr2              | 5.71                                                                   | 5.57 | 5.49 | 5.70 | 6.72 | 6.80 | 6.86 | 7.40  |
| Chr3              | 4.74                                                                   | 4.66 | 4.68 | 4.61 | 5.65 | 5.72 | 5.76 | 6.20  |
| Chr4              | 4.80                                                                   | 4.69 | 4.58 | 4.75 | 5.62 | 5.69 | 5.72 | 6.07  |
| Chr5              | 4.26                                                                   | 4.21 | 4.25 | 4.10 | 5.09 | 5.16 | 5.16 | 5.65  |
| Chr6              | 4.91                                                                   | 4.85 | 4.76 | 4.74 | 5.72 | 5.78 | 5.82 | 5.21  |
| Chr7              | 4.21                                                                   | 4.10 | 4.07 | 4.03 | 4.55 | 4.98 | 4.55 | 5.18  |
| Chr8              | 3.39                                                                   | 3.35 | 3.35 | 3.52 | 4.09 | 4.14 | 4.19 | 4.62  |
| Chr9              | 3.68                                                                   | 3.47 | 3.49 | 3.36 | 4.05 | 4.08 | 4.13 | 4.66  |
| Chr10             | 3.81                                                                   | 3.77 | 3.81 | 3.74 | 4.41 | 4.45 | 4.44 | 4.84  |
| Chr11             | 3.38                                                                   | 3.35 | 3.39 | 3.43 | 3.98 | 4.03 | 4.08 | 4.43  |
| Chr12             | 3.28                                                                   | 3.22 | 3.18 | 3.23 | 3.93 | 3.98 | 4.00 | 4.36  |
| Chr13             | 2.56                                                                   | 2.53 | 2.55 | 2.44 | 2.96 | 3.00 | 3.02 | 3.23  |
| Chr14             | 2.28                                                                   | 2.26 | 2.28 | 2.20 | 2.67 | 2.71 | 2.71 | 2.94  |
| Chr15             | 2.22                                                                   | 2.20 | 2.20 | 2.19 | 2.58 | 2.61 | 2.61 | 2.82  |
| Chr16             | 2.47                                                                   | 2.45 | 2.48 | 2.39 | 2.86 | 2.89 | 2.93 | 2.96  |

|       |       |       |       |       |       |       |       |       |
|-------|-------|-------|-------|-------|-------|-------|-------|-------|
| Chr17 | 2.23  | 2.22  | 2.23  | 1.99  | 2.64  | 2.68  | 2.68  | 2.81  |
| Chr18 | 1.94  | 1.93  | 1.90  | 1.83  | 2.23  | 2.26  | 2.27  | 2.41  |
| Chr19 | 1.66  | 1.65  | 1.66  | 1.55  | 1.96  | 1.99  | 2.02  | 2.16  |
| Chr20 | 2.21  | 2.19  | 2.18  | 1.69  | 2.57  | 2.59  | 2.58  | 2.37  |
| Chr21 | 2.05  | 2.05  | 1.80  | 1.18  | 2.20  | 2.22  | 2.21  | 2.01  |
| Chr22 | 1.86  | 1.80  | 1.79  | 1.17  | 2.01  | 2.03  | 2.01  | 2.11  |
| ChrX  | 3.78  | 3.50  | 3.53  | 3.66  | 4.14  | 4.47  | 4.36  | 4.89  |
| ChrY  | 1.00  | 0.71  | 0.71  | 0.64  | 0.77  | 0.80  | 0.84  | 0.71  |
| Total | 80.13 | 77.89 | 77.43 | 75.38 | 91.80 | 93.56 | 93.38 | 97.41 |

Table 4: Detailed compressed sizes of large collections of genomes by HRCM and other compared methods

| To-be-compressed chromosome number | Original file size (MB) | Compressed size (MB) by |          |                  |                   |                   |                   |
|------------------------------------|-------------------------|-------------------------|----------|------------------|-------------------|-------------------|-------------------|
|                                    |                         | HiRGC                   | SCCG     | HRCM-B ( $p=5$ ) | HRCM-B ( $p=10$ ) | HRCM-B ( $p=15$ ) | HRCM-B ( $p=20$ ) |
| chr1                               | 265,231.77              | 2,475.09                | 2,431.08 | 141.28           | 127.36            | 122.03            | <b>112.33</b>     |
| chr2                               | 258,893.91              | 2,365.94                | 2,327.49 | 148.24           | 132.29            | 126.24            | <b>116.25</b>     |
| chr3                               | 210,796.86              | 430.66                  | 2,861.39 | 112.85           | 101.40            | 97.35             | <b>89.56</b>      |
| chr4                               | 203,284.71              | 1,272.56                | 1,245.77 | 120.90           | 107.74            | 102.76            | <b>93.76</b>      |
| chr5                               | 192,592.79              | 1,187.50                | 1,162.34 | 107.26           | 96.74             | 92.70             | <b>85.46</b>      |
| chr6                               | 182,102.09              | 619.34                  | 600.46   | 103.95           | 92.19             | 87.86             | <b>80.71</b>      |
| chr7                               | 169,370.15              | 892.30                  | 873.08   | 96.60            | 86.65             | 82.84             | <b>76.04</b>      |
| chr8                               | 155,750.48              | 1,605.39                | 1,578.74 | 98.20            | 88.40             | 84.73             | <b>78.23</b>      |
| chr9                               | 150,259.34              | 1,001.40                | 978.79   | 71.72            | 64.72             | 61.68             | <b>56.66</b>      |
| chr10                              | 144,293.59              | 541.09                  | 525.80   | 79.13            | 71.02             | 67.85             | <b>62.09</b>      |
| chr11                              | 143,680.56              | 1,070.46                | 1,047.88 | 80.84            | 73.23             | 70.22             | <b>64.58</b>      |
| chr12                              | 142,399.72              | 2,651.88                | 2,619.23 | 94.20            | 84.15             | 80.15             | <b>72.46</b>      |
| chr13                              | 122,600.09              | 333.95                  | /        | 53.60            | 48.30             | 46.13             | <b>42.65</b>      |
| chr14                              | 114,222.28              | 390.53                  | /        | 50.66            | 45.46             | 43.63             | <b>40.13</b>      |
| chr15                              | 109,143.69              | 767.50                  | 752.53   | 49.92            | 45.33             | 43.56             | <b>39.74</b>      |
| chr16                              | 96,191.27               | 1,211.78                | 1,191.28 | 57.65            | 51.92             | 49.79             | <b>46.13</b>      |
| chr17                              | 86,397.23               | 1,784.34                | 1,762.98 | 56.45            | 51.15             | 48.94             | <b>45.33</b>      |
| chr18                              | 83,120.90               | 401.86                  | 391.79   | 43.95            | 39.89             | 38.18             | <b>35.28</b>      |
| chr19                              | 62,903.20               | 222.05                  | 211.29   | 37.48            | 34.13             | 32.62             | <b>30.22</b>      |
| chr20                              | 67,082.51               | 164.38                  | 157.81   | 33.93            | 31.30             | 30.25             | <b>28.06</b>      |
| chr21                              | 51,209.90               | 420.28                  | 412.37   | 22.87            | 20.85             | 19.98             | <b>18.66</b>      |
| chr22                              | 54,541.28               | 296.98                  | 289.43   | 23.53            | 21.57             | 20.69             | <b>19.23</b>      |
| chrX                               | 163,753.35              | 1,567.86                | 1,539.11 | 68.90            | 63.55             | 56.47             | <b>43.66</b>      |

|       |              |           |            |          |          |          |                 |
|-------|--------------|-----------|------------|----------|----------|----------|-----------------|
| chrY  | 29,133.14    | 84.80     | 82.57      | 2.16     | 2.16     | 2.15     | <b>2.14</b>     |
| Total | 3,258,954.79 | 23,759.93 | 25,043.19? | 1,756.25 | 1,581.49 | 1,508.81 | <b>1,379.36</b> |

" /" indicates that the method failed to compress this chromosome.

"?" indicates that the value does not contain the sizes of the failed chromosomes.

The value of  $p$  means the percentage of the second-level matching.

Bold indicates the best value of the case.

Table 5: Detailed compression time of large collections of genomes by HRCM and other compared methods

| To-be-compressed chromosome number | Original file size (MB) | Compression time (hour) by |         |                  |                   |                   |                   |
|------------------------------------|-------------------------|----------------------------|---------|------------------|-------------------|-------------------|-------------------|
|                                    |                         | HiRGC                      | SCCG    | HRCM-B ( $p=5$ ) | HRCM-B ( $p=10$ ) | HRCM-B ( $p=15$ ) | HRCM-B ( $p=20$ ) |
| chr1                               | 265,231.77              | 11.95                      | 21.25   | <b>11.19</b>     | 12.23             | 11.86             | 11.64             |
| chr2                               | 258,893.91              | 10.30                      | 19.80   | <b>7.77</b>      | 8.70              | 8.50              | 8.95              |
| chr3                               | 210,796.86              | 5.96                       | 19.48   | 4.37             | 4.75              | <b>3.96</b>       | 5.21              |
| chr4                               | 203,284.71              | 5.11                       | 13.74   | <b>4.57</b>      | 4.94              | 4.72              | 5.00              |
| chr5                               | 192,592.79              | 5.51                       | 16.11   | <b>3.86</b>      | 4.63              | 4.27              | 4.64              |
| chr6                               | 182,102.09              | 4.52                       | 13.74   | <b>3.24</b>      | 3.85              | 3.78              | 4.20              |
| chr7                               | 169,370.15              | 4.85                       | 12.40   | 4.21             | <b>3.84</b>       | 3.86              | 3.94              |
| chr8                               | 155,750.48              | 4.40                       | 11.15   | <b>3.47</b>      | 3.59              | 3.89              | 3.91              |
| chr9                               | 150,259.34              | 3.60                       | 12.00   | <b>2.57</b>      | 3.27              | 3.10              | 3.05              |
| chr10                              | 144,293.59              | 3.48                       | 9.35    | <b>2.59</b>      | 2.77              | 2.83              | 2.85              |
| chr11                              | 143,680.56              | 3.74                       | 12.45   | <b>2.68</b>      | 3.03              | 3.03              | 3.22              |
| chr12                              | 142,399.72              | 6.92                       | 12.74   | <b>6.22</b>      | 6.54              | 6.32              | 6.61              |
| chr13                              | 122,600.09              | 2.67                       | /       | <b>1.64</b>      | <b>1.62</b>       | 1.80              | 1.77              |
| chr14                              | 114,222.28              | 2.61                       | /       | <b>1.59</b>      | 1.71              | 1.75              | 1.76              |
| chr15                              | 109,143.69              | 3.31                       | 10.44   | <b>1.92</b>      | 2.04              | 2.04              | 2.04              |
| chr16                              | 96,191.27               | 4.43                       | 7.41    | <b>2.63</b>      | 2.77              | 2.92              | 2.78              |
| chr17                              | 86,397.23               | 5.46                       | 9.95    | 4.33             | 4.49              | 4.50              | <b>4.24</b>       |
| chr18                              | 83,120.90               | 2.56                       | 7.46    | <b>1.11</b>      | 1.17              | 1.17              | 1.21              |
| chr19                              | 62,903.20               | 2.86                       | 5.44    | <b>1.51</b>      | 1.64              | 1.56              | 1.59              |
| chr20                              | 67,082.51               | 2.19                       | 4.77    | <b>0.87</b>      | 0.90              | 0.93              | 0.94              |
| chr21                              | 51,209.90               | 1.35                       | 16.95   | <b>0.59</b>      | 0.61              | 0.61              | 0.64              |
| chr22                              | 54,541.28               | 1.54                       | 16.78   | <b>0.61</b>      | 0.64              | 0.66              | 0.67              |
| chrX                               | 163,753.35              | 5.17                       | 14.21   | 3.52             | <b>2.83</b>       | 3.70              | 3.66              |
| chrY                               | 29,133.14               | 0.65                       | 2.36    | 0.27             | 0.27              | <b>0.26</b>       | 0.27              |
| Total                              | 3,258,954.7             | 105.14                     | 269.96? | <b>77.34</b>     | 82.84             | 82.01             | 84.80             |

" /" indicates that the method failed to compress this chromosome.



"?" indicates that the value does not contain the compression time of the failed chromosomes.

The value of  $p$  means the percentage of the second-level matching.

Bold indicates the best value of the case.

Table 6: Detailed compression memory usage of large collections of genomes by HRCM-B

| To-be-compressed chromosome number | Compression memory (GB) by |                   |                   |                   |
|------------------------------------|----------------------------|-------------------|-------------------|-------------------|
|                                    | HRCM-B ( $p=5$ )           | HRCM-B ( $p=10$ ) | HRCM-B ( $p=15$ ) | HRCM-B ( $p=20$ ) |
| chr1                               | 4.60                       | 6.90              | 9.23              | 11.55             |
| chr2                               | 4.60                       | 6.84              | 9.10              | 11.37             |
| chr3                               | 2.94                       | 3.78              | 4.62              | 5.47              |
| chr4                               | 3.49                       | 4.92              | 6.35              | 7.80              |
| chr5                               | 3.36                       | 4.67              | 6.00              | 7.31              |
| chr6                               | 2.87                       | 3.79              | 4.72              | 5.65              |
| chr7                               | 2.97                       | 4.07              | 5.15              | 6.27              |
| chr8                               | 3.37                       | 4.93              | 6.48              | 8.02              |
| chr9                               | 2.83                       | 3.97              | 5.12              | 6.27              |
| chr10                              | 2.59                       | 3.41              | 4.24              | 5.05              |
| chr11                              | 2.94                       | 4.12              | 5.30              | 6.47              |
| chr12                              | 3.93                       | 6.12              | 8.30              | 10.49             |
| chr13                              | 2.18                       | 2.81              | 3.44              | 4.06              |
| chr14                              | 2.15                       | 2.79              | 3.42              | 4.05              |
| chr15                              | 2.36                       | 3.23              | 4.09              | 4.95              |
| chr16                              | 2.63                       | 3.77              | 4.92              | 6.06              |
| chr17                              | 2.96                       | 4.41              | 5.87              | 7.31              |
| chr18                              | 2.07                       | 2.68              | 3.30              | 3.92              |
| chr19                              | 2.07                       | 2.24              | 2.69              | 3.14              |
| chr20                              | 1.78                       | 2.20              | 2.60              | 3.02              |
| chr21                              | 1.76                       | 2.30              | 2.82              | 3.36              |
| chr22                              | 1.67                       | 2.12              | 2.57              | 3.02              |
| chrX                               | 3.34                       | 4.81              | 6.28              | 7.76              |
| chrY                               | 1.35                       | 1.51              | 1.66              | 1.81              |
| Maximum                            | 4.60                       | 6.90              | 9.23              | 11.55             |

The value of  $p$  means the percentage of the second-level matching.

Maximum means the peak memory usage of this method when compressing the data sets.

Table 7: Compression time of other species data sets by different methods

| Reference | To-be-compressed | Compression time (s) by |      |      |      |       |      |           |           |
|-----------|------------------|-------------------------|------|------|------|-------|------|-----------|-----------|
|           |                  | iDoComp                 | GDC2 | ERGC | NRGC | HiRGC | SCCG | HRCM-S    | HRCM-B    |
| ce6       | ce10,ce11        | 28                      | 38   | 41   | 100  | 37    | 35   | 21        | <b>15</b> |
| ce10      | ce6,ce11         | 26                      | 22   | 40   | 66   | 29    | 31   | 19        | <b>13</b> |
| ce11      | ce6,ce10         | 28                      | 29   | 458  | 66   | 30    | 30   | 24        | <b>14</b> |
| TAIR9     | TAIR10           | 37                      | 18   | 21   | 37   | 15    | 16   | <b>13</b> | <b>13</b> |

|         |                 |     |     |     |     |    |          |           |           |
|---------|-----------------|-----|-----|-----|-----|----|----------|-----------|-----------|
| TAIR10  | TAIR9           | 32  | 18  | 48  | 37  | 14 | 17       | <b>13</b> | <b>13</b> |
| TIGR5.0 | TIGR6.0,TIGR7.0 | 133 | 140 | 156 | 165 | 66 | 202      | 66        | <b>42</b> |
| TIGR6.0 | TIGR5.0,TIGR7.0 | 115 | 106 | 107 | 151 | 67 | 143      | 72        | <b>43</b> |
| TIGR7.0 | TIGR5.0,TIGR6.0 | 131 | 112 | 238 | 153 | 67 | 151      | 73        | <b>42</b> |
| sacCer2 | sacCer3         | 4   | 6   | 8   | 7   | 37 | <b>2</b> | 9         | 9         |
| sacCer3 | sacCer2         | 4   | 6   | 7   | 8   | 39 | <b>2</b> | 9         | 9         |

Bold indicates the best value of the case.

Table 8: Decompression time of other species data sets by different methods

| Reference | To-be-compressed | Decompression time (s) by |      |          |      |           |          |          |           |
|-----------|------------------|---------------------------|------|----------|------|-----------|----------|----------|-----------|
|           |                  | iDoComp                   | GDC2 | ERGC     | NRGC | HiRGC     | SCCG     | HRCM-S   | HRCM-B    |
| ce6       | ce10,ce11        | 6                         | 13   | 8        | 11   | 5         | 7        | 8        | <b>4</b>  |
| ce10      | ce6,ce11         | 8                         | 13   | 9        | 10   | <b>5</b>  | 7        | 7        | <b>5</b>  |
| ce11      | ce6,ce10         | 8                         | 12   | 10       | 11   | <b>5</b>  | 6        | 7        | <b>5</b>  |
| TAIR9     | TAIR10           | <b>3</b>                  | /    | 4        | /    | 4         | 3        | 5        | 5         |
| TAIR10    | TAIR9            | <b>4</b>                  | /    | 5        | /    | <b>4</b>  | <b>4</b> | <b>4</b> | <b>4</b>  |
| TIGR5.0   | TIGR6.0,TIGR7.0  | 25                        | 29   | 16       | 30   | 16        | 24       | 24       | <b>15</b> |
| TIGR6.0   | TIGR5.0,TIGR7.0  | 22                        | 32   | 18       | 26   | <b>13</b> | 21       | 24       | 17        |
| TIGR7.0   | TIGR5.0,TIGR6.0  | 22                        | 31   | 18       | 24   | <b>13</b> | 22       | 24       | 21        |
| sacCer2   | sacCer3          | <b>1</b>                  | 4    | <b>1</b> | 5    | <b>1</b>  | <b>1</b> | <b>1</b> | <b>1</b>  |
| sacCer3   | sacCer2          | <b>1</b>                  | 5    | <b>1</b> | 6    | <b>1</b>  | <b>1</b> | <b>1</b> | <b>1</b>  |

Bold indicates the best value of the case.

"/" indicates that the method failed to decompress the file.

Table 9: Compressed sizes of HRCM and other reference-free methods in reference-free compression experiment

| To-be-compressed | Original file size (B) | Compressed file size (B) by |            |            |            |            |            |                   |            |
|------------------|------------------------|-----------------------------|------------|------------|------------|------------|------------|-------------------|------------|
|                  |                        | gzip                        | bzip2      | lzma       | ppmd       | MFC-2      | MFC-3      | GeCo2             | HRCM-S     |
| AeCa             | 1,591,049              | 498,251                     | 463,727    | 443,908    | 419,575    | 410,373    | 410,947    | <b>380,115</b>    | 388,949    |
| AgPh             | 43,970                 | 14,090                      | 13,061     | 13,108     | 12,664     | 11,762     | 11,860     | <b>10,708</b>     | 11,991     |
| AnCa             | 142,189,675            | 44,021,249                  | 40,794,149 | 34,870,625 | 36,871,748 | 33,573,162 | 33,098,570 | <b>29,481,172</b> | 34,257,156 |
| DaRe             | 62,565,020             | 19,043,617                  | 17,727,572 | 14,832,647 | 16,025,115 | 14,725,780 | 14,548,815 | <b>11,488,819</b> | 14,846,130 |
| DrMe             | 32,181,429             | 10,049,893                  | 9,420,981  | 8,695,711  | 8,461,425  | 8,282,675  | 8,242,863  | <b>7,481,093</b>  | 7,864,880  |
| EnIn             | 26,403,087             | 8,252,413                   | 7,696,896  | 6,717,422  | 6,864,989  | 6,471,750  | 6,381,059  | <b>5,170,889</b>  | 6,381,047  |
| EsCo             | 4,641,652              | 1,457,983                   | 1,356,790  | 1,277,986  | 1,226,095  | 1,196,397  | 1,198,507  | <b>1,098,552</b>  | 1,139,218  |
| GaGa             | 148,532,294            | 46,016,176                  | 42,973,370 | 39,516,291 | 38,396,666 | 37,376,513 | 37,215,495 | <b>33,877,671</b> | 35,674,338 |
| HaHi             | 3,890,005              | 1,208,806                   | 1,120,129  | 1,060,983  | 999,799    | 981,901    | 981,987    | <b>902,831</b>    | 926,283    |
| HePy             | 1,667,825              | 513,864                     | 478,440    | 448,682    | 425,062    | 415,195    | 415,328    | <b>375,481</b>    | 392,920    |
| HoSa             | 189,752,667            | 58,071,457                  | 53,472,930 | 47,285,849 | 48,256,912 | 45,070,974 | 44,585,616 | <b>38,845,642</b> | 44,705,871 |
| OrSa             | 43,262,523             | 13,442,311                  | 12,618,218 | 10,740,878 | 11,391,627 | 10,541,817 | 10,428,913 | <b>8,646,543</b>  | 10,590,219 |
| PIFa             | 8,986,712              | 2,730,066                   | 2,565,298  | 2,291,492  | 2,262,496  | 2,166,310  | 2,162,922  | <b>1,925,726</b>  | 2,095,075  |
| ScPo             | 10,652,155             | 3,358,134                   | 3,128,567  | 2,922,245  | 2,823,232  | 2,735,848  | 2,738,035  | <b>2,518,963</b>  | 2,627,654  |
| WaMe             | 9,144,432              | 2,888,155                   | 2,685,749  | 2,542,882  | 2,434,559  | 2,383,832  | 2,387,012  | <b>2,217,655</b>  | 2,266,185  |

|         |             |             |             |            |            |                  |                   |               |            |
|---------|-------------|-------------|-------------|------------|------------|------------------|-------------------|---------------|------------|
| YeMi    | 73,689      | 22,806      | 21,184      | 20,777     | 19,721     | 18,373           | 18,454            | <b>16,798</b> | 18,388     |
| ce6     | 102,293,252 | 31,814,131  | 28,900,571  | 26,789,336 | 25,669,209 | 22,719,271       | <b>22,644,005</b> | 20,028,845*   | 23,980,249 |
| TAIR9   | 121,223,713 | 35,967,576  | 33,743,432  | 30,340,560 | 30,296,845 | 27,525,512       | <b>27,389,078</b> | 27,254,298*   | 28,780,372 |
| TIGR5.0 | 378,279,319 | 113,872,933 | 107,018,536 | 89,043,109 | 96,932,020 | 77,762,707       | <b>76,625,018</b> | 77,231,172*   | 91,017,382 |
| sacCer2 | 12,399,942  | 3,822,046   | 3,568,860   | 3,431,368  | 3,209,679  | <b>2,904,003</b> | 2,910,370         | 2,883,018*    | 3,047,403  |

Bold indicates the best value of the case. Gray indicates the second best value of the case.

\* indicates GeCo2 cannot achieve lossless compression in these data sets because it is only compatible for {A, C, G, T} symbols.

Table 10: Compression time of HRCM and other reference-free methods in reference-free compression experiment

| To-be-compressed | Original file size (B) | Compression time (s) by |       |        |              |        |        |             |        |
|------------------|------------------------|-------------------------|-------|--------|--------------|--------|--------|-------------|--------|
|                  |                        | gzip                    | bzip2 | lzma   | ppmd         | MFC-2  | MFC-3  | GeCo2       | HRCM-S |
| AeCa             | 1,591,049              | 0.37                    | 0.17  | 0.93   | <b>0.13</b>  | 0.63   | 1.52   | 0.72        | 0.81   |
| AgPh             | 43,970                 | 0.21                    | 0.14  | 0.37   | 0.17         | 0.20   | 0.56   | <b>0.01</b> | 0.38   |
| AnCa             | 142,189,675            | 27.22                   | 12.72 | 127.32 | <b>6.86</b>  | 39.27  | 44.11  | 55.53       | 22.27  |
| DaRe             | 62,565,020             | 11.83                   | 5.73  | 62.59  | <b>3.47</b>  | 16.93  | 19.33  | 67.49       | 9.77   |
| DrMe             | 32,181,429             | 6.33                    | 2.92  | 26.66  | <b>1.63</b>  | 6.68   | 10.74  | 34.37       | 5.44   |
| EnIn             | 26,403,087             | 5.30                    | 2.39  | 27.41  | <b>1.39</b>  | 6.47   | 8.72   | 27.40       | 4.54   |
| EsCo             | 4,641,652              | 0.97                    | 0.46  | 3.19   | <b>0.32</b>  | 1.19   | 1.97   | 1.90        | 1.16   |
| GaGa             | 148,532,294            | 28.53                   | 13.12 | 150.32 | <b>7.14</b>  | 31.84  | 46.33  | 160.81      | 23.76  |
| HaHi             | 3,890,005              | 0.83                    | 0.41  | 2.49   | <b>0.25</b>  | 1.26   | 1.72   | 1.60        | 1.02   |
| HePy             | 1,667,825              | 0.39                    | 0.20  | 1.10   | <b>0.12</b>  | 0.65   | 1.43   | 0.77        | 0.63   |
| HoSa             | 189,752,667            | 35.87                   | 17.19 | 185.80 | <b>8.90</b>  | 51.43  | 58.47  | 225.27      | 29.36  |
| OrSa             | 43,262,523             | 8.41                    | 3.90  | 36.24  | <b>2.15</b>  | 12.13  | 13.93  | 46.23       | 7.06   |
| PIFa             | 8,986,712              | 1.81                    | 0.85  | 6.77   | <b>0.49</b>  | 2.61   | 3.22   | 10.44       | 1.79   |
| ScPo             | 10,652,155             | 2.21                    | 1.70  | 8.36   | <b>0.62</b>  | 3.21   | 3.85   | 11.06       | 2.11   |
| WaMe             | 9,144,432              | 1.93                    | 0.89  | 6.68   | <b>0.53</b>  | 2.77   | 3.40   | 3.68        | 1.87   |
| YeMi             | 73,689                 | 0.30                    | 0.20  | 0.57   | 0.17         | 0.21   | 0.56   | <b>0.05</b> | 0.37   |
| ce6              | 102,293,252            | 22.61                   | 9.82  | 95.61  | <b>6.50</b>  | 31.36  | 46.94  | 47.48       | 22.96  |
| TAIR9            | 121,223,713            | 23.20                   | 12.32 | 122.35 | <b>7.19</b>  | 35.62  | 61.39  | 62.46       | 23.52  |
| TIGR5.0          | 378,279,319            | 71.16                   | 34.79 | 375.77 | <b>19.37</b> | 100.72 | 151.80 | 193.60      | 71.89  |
| sacCer2          | 12,399,942             | 2.89                    | 1.36  | 6.54   | <b>19.37</b> | 7.67   | 18.22  | 8.99        | 14.47  |

Bold indicates the best value of the case.

Table 11: Decompression time of HRCM and other reference-free methods in reference-free compression experiment

| Sequence | Decompression time (s) by |       |      |             |       |       |       |             |
|----------|---------------------------|-------|------|-------------|-------|-------|-------|-------------|
|          | gzip                      | bzip2 | lzma | ppmd        | MFC-2 | MFC-3 | GeCo2 | HRCM-S      |
| AeCa     | 0.21                      | 0.91  | 0.33 | <b>0.12</b> | 0.57  | 0.87  | 0.74  | 0.13        |
| AgPh     | 0.70                      | 0.80  | 0.60 | 0.17        | 0.19  | 0.55  | 0.02  | <b>0.02</b> |
| AnCa     | <b>1.62</b>               | 5.61  | 2.43 | 7.23        | 29.33 | 30.90 | 55.68 | 7.33        |
| DaRe     | <b>0.48</b>               | 2.45  | 0.92 | 3.18        | 11.53 | 14.20 | 66.89 | 3.43        |
| DrMe     | <b>0.28</b>               | 1.33  | 0.50 | 1.70        | 5.53  | 7.28  | 34.23 | 1.87        |

|         |             |             |             |       |       |        |        |       |
|---------|-------------|-------------|-------------|-------|-------|--------|--------|-------|
| EnIn    | <b>0.25</b> | 1.94        | 0.42        | 1.41  | 5.94  | 6.35   | 27.43  | 1.51  |
| EsCo    | 0.57        | <b>0.25</b> | 0.91        | 0.31  | 1.86  | 1.48   | 1.96   | 0.34  |
| GaGa    | <b>1.10</b> | 5.86        | 2.00        | 7.56  | 27.16 | 30.43  | 161.69 | 8.33  |
| HaHi    | 0.46        | <b>0.20</b> | 0.77        | 0.27  | 0.89  | 1.91   | 1.61   | 0.27  |
| HePy    | 0.25        | <b>0.10</b> | 0.44        | 0.13  | 0.45  | 0.88   | 0.75   | 0.13  |
| HoSa    | <b>1.37</b> | 7.38        | 2.58        | 9.51  | 38.15 | 39.66  | 224.18 | 10.53 |
| OrSa    | <b>0.38</b> | 1.86        | 0.66        | 2.26  | 8.70  | 9.93   | 45.90  | 2.41  |
| PIFa    | 0.97        | 0.43        | <b>0.16</b> | 0.53  | 1.74  | 2.38   | 10.46  | 0.57  |
| ScPo    | <b>0.11</b> | 0.49        | 0.19        | 0.68  | 2.28  | 2.78   | 11.12  | 0.65  |
| WaMe    | 0.96        | 0.42        | <b>0.17</b> | 0.55  | 1.89  | 2.49   | 3.72   | 0.56  |
| YeMi    | 0.80        | <b>0.11</b> | 0.80        | 0.21  | 0.20  | 0.54   | 0.06   | 0.01  |
| ce6     | <b>0.90</b> | 5.18        | 1.80        | 6.64  | 23.47 | 36.55  | 41.41  | 6.34  |
| TAIR9   | <b>1.61</b> | 5.71        | 2.14        | 7.32  | 27.96 | 37.77  | 66.43  | 7.55  |
| TIGR5.0 | <b>3.29</b> | 16.47       | 6.90        | 21.50 | 92.16 | 104.18 | 183.12 | 21.94 |
| sacCer2 | <b>0.12</b> | 0.65        | 0.25        | 0.82  | 5.21  | 13.26  | 8.64   | 1.63  |

Bold indicates the best value of the case.

Table 12: Compression memory usage of HRCM and other reference-free methods in reference-free compression experiment

| To-be-compressed | Compression memory (KB) by |       |        |        |         |           |           |           |
|------------------|----------------------------|-------|--------|--------|---------|-----------|-----------|-----------|
|                  | gzip                       | bzip2 | lzma   | ppmd   | MFC-2   | MFC-3     | GeCo2     | HRCM-S    |
| AeCa             | <b>700</b>                 | 7,000 | 96,120 | 5,660  | 526,680 | 2,377,732 | 526,048   | 554,584   |
| AgPh             | <b>700</b>                 | 7,000 | 96,120 | 5,660  | 526,680 | 2,377,732 | ?         | 1,053,980 |
| AnCa             | <b>700</b>                 | 7,000 | 96,120 | 5,660  | 526,680 | 2,377,732 | 526,120   | 1,350,360 |
| DaRe             | <b>700</b>                 | 7,000 | 96,120 | 5,660  | 526,680 | 2,377,732 | 2,428,728 | 1,184,492 |
| DrMe             | <b>700</b>                 | 7,000 | 96,120 | 5,660  | 526,680 | 2,377,732 | 2,428,728 | 1,118,568 |
| EnIn             | <b>700</b>                 | 7,000 | 96,120 | 5,660  | 526,680 | 2,377,732 | 2,394,160 | 1,105,636 |
| EsCo             | <b>700</b>                 | 7,000 | 96,120 | 5,660  | 526,680 | 2,377,732 | 526,120   | 1,053,116 |
| GaGa             | <b>700</b>                 | 7,000 | 96,120 | 5,660  | 526,680 | 2,377,732 | 3,442,748 | 1,371,920 |
| HaHi             | <b>700</b>                 | 7,000 | 96,120 | 5,660  | 526,680 | 2,377,732 | 526,116   | 1,055,596 |
| HePy             | <b>700</b>                 | 7,000 | 96,120 | 5,660  | 526,680 | 2,377,732 | 526,116   | 939,360   |
| HoSa             | <b>700</b>                 | 8,000 | 96,120 | 5,660  | 526,680 | 2,377,732 | 4,001,596 | 1,452,340 |
| OrSa             | <b>700</b>                 | 7,000 | 96,120 | 5,660  | 526,680 | 2,377,732 | 2,428,728 | 1,142,376 |
| PIFa             | <b>700</b>                 | 7,000 | 96,120 | 5,660  | 526,680 | 2,377,732 | 1,870,396 | 1,067,220 |
| ScPo             | <b>700</b>                 | 7,000 | 96,120 | 5,660  | 526,680 | 2,377,732 | 1,869,872 | 1,073,730 |
| WaMe             | <b>700</b>                 | 7,000 | 96,120 | 5,660  | 526,680 | 2,377,732 | 526,048   | 1,068,724 |
| YeMi             | <b>700</b>                 | 7,000 | 96,120 | 5,660  | 526,680 | 2,377,732 | ?         | 1,050,048 |
| ce6              | <b>816</b>                 | 7,664 | 96,120 | 10,484 | 526,716 | 2,377,756 | 526,124   | 1,096,080 |
| TAIR9            | <b>812</b>                 | 7,180 | 96,120 | 5,736  | 536,848 | 2,392,360 | 526,124   | 1,109,032 |
| TIGR5.0          | <b>816</b>                 | 7,904 | 96,120 | 5,752  | 541,116 | 2,377,744 | 526,124   | 1,143,528 |
| sacCer2          | <b>820</b>                 | 7,028 | 32,328 | 7,768  | 526,700 | 2,377,768 | 526,124   | 1,054,368 |
| Maximum          | <b>820</b>                 | 7,904 | 96,120 | 10,484 | 541,116 | 2,392,360 | 4,001,596 | 1,452,340 |

Bold indicates the best value of the case.

"?" indicates that the compression is too fast to record the memory usage.

Maximum means the peak memory usage of this method when compressing the data sets.

Table 13: Decompression memory usage of HRCM and other reference-free methods in reference-free compression experiment

| Sequence | Decompression memory (KB) by |       |       |       |         |           |           |         |
|----------|------------------------------|-------|-------|-------|---------|-----------|-----------|---------|
|          | gzip                         | bzip2 | lzma  | ppmd  | MFC-2   | MFC-3     | GeCo2     | HRCM-S  |
| AeCa     | <b>600</b>                   | 4,200 | 9,000 | 5,600 | 525,628 | 2,376,684 | 525,708   | ?       |
| AgPh     | <b>600</b>                   | 4,200 | 9,000 | 5,600 | 525,628 | 2,376,684 | ?         | ?       |
| AnCa     | <b>600</b>                   | 4,200 | 9,000 | 7,648 | 525,628 | 2,376,684 | 525,784   | 248,328 |
| DaRe     | <b>600</b>                   | 4,200 | 9,000 | 5,600 | 525,628 | 2,376,684 | 2,428,396 | 255,976 |
| DrMe     | <b>600</b>                   | 4,200 | 9,000 | 5,600 | 525,628 | 2,376,684 | 2,428,400 | 135,600 |
| EnIn     | <b>600</b>                   | 4,200 | 9,000 | 5,600 | 525,628 | 2,376,684 | 2,393,828 | 103,268 |
| EsCo     | <b>600</b>                   | 4,200 | 9,000 | 5,600 | 525,628 | 2,376,684 | 525,784   | ?       |
| GaGa     | <b>600</b>                   | 4,200 | 9,000 | 7,648 | 525,628 | 2,376,684 | 3,442,408 | 303,912 |
| HaHi     | <b>600</b>                   | 4,200 | 9,000 | 5,600 | 525,628 | 2,376,684 | 525,780   | ?       |
| HePy     | <b>600</b>                   | 4,200 | 9,000 | 5,600 | 525,628 | 2,376,684 | 525,768   | ?       |
| HoSa     | <b>600</b>                   | 4,200 | 9,000 | 7,648 | 525,628 | 2,376,684 | 4,001,260 | 774,308 |
| OrSa     | <b>600</b>                   | 4,200 | 9,000 | 5,600 | 525,628 | 2,376,684 | 2,428,400 | 135,812 |
| PIFa     | <b>600</b>                   | 4,200 | 9,000 | 5,600 | 525,628 | 2,376,684 | 1,870,060 | 31,864  |
| ScPo     | <b>600</b>                   | 4,200 | 9,000 | 5,600 | 525,628 | 2,376,684 | 1,869,540 | 45,296  |
| WaMe     | <b>600</b>                   | 4,200 | 9,000 | 5,600 | 525,628 | 2,376,684 | 525,784   | 11,616  |
| YeMi     | <b>600</b>                   | 4,200 | 9,000 | 5,600 | 525,628 | 2,376,684 | ?         | ?       |
| ce6      | <b>704</b>                   | 4,128 | 9,048 | 9,940 | 525,668 | 2,376,732 | 525,784   | 75,028  |
| TAIR9    | <b>708</b>                   | 4,128 | 9,052 | 7,748 | 525,672 | 2,392,408 | 525,784   | 50,784  |
| TIGR5.0  | <b>704</b>                   | 4,128 | 9,048 | 7,764 | 525,680 | 2,376,720 | 525,784   | 116,244 |
| sacCer2  | <b>712</b>                   | 4,128 | 3,904 | 5,684 | 525,680 | 2,376,716 | 525,784   | ?       |
| Maximum  | <b>712</b>                   | 4,200 | 9,052 | 9,940 | 525,680 | 2,392,408 | 4,001,260 | 774,308 |

Bold indicates the best value of the case.

"?" indicates that the decompression is too fast to record the memory usage.

Maximum means the peak memory usage of this method when decompressing the data sets.

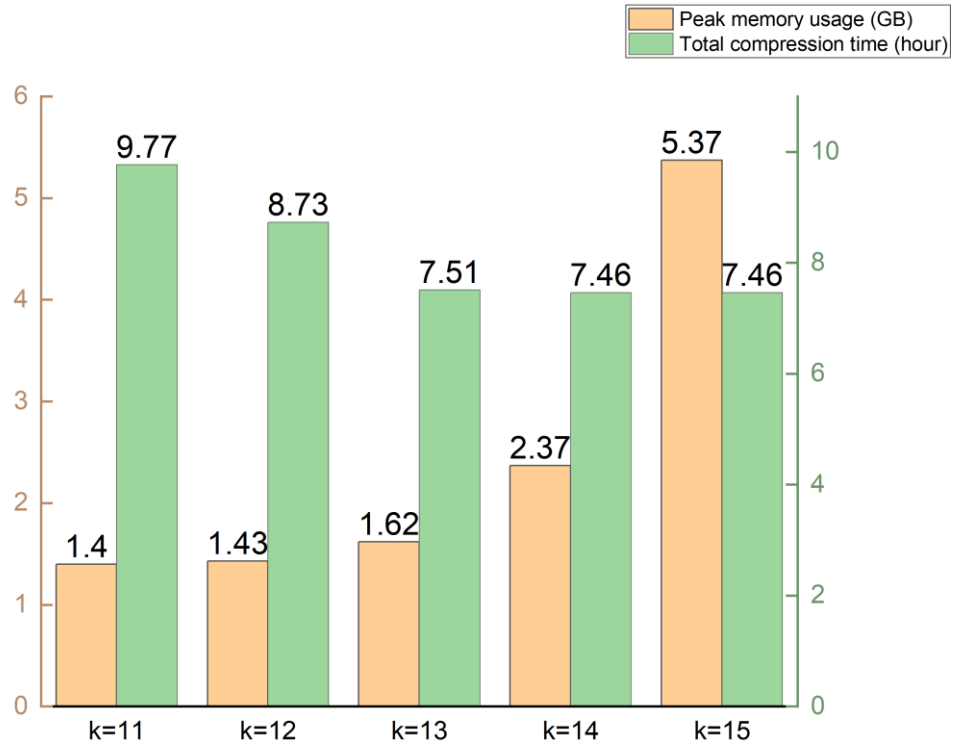

Figure 1: Peak memory usage and total compression time under different values of  $k$  on the eight benchmark human genomes

## 4 References

- [1] S. Deorowicz, A. Danek, and M. Niemiec, "GDC 2: Compression of large collections of genomes," *Sci Rep*, vol. 5, p. 11565, Jun 25 2015.
- [2] D. Pratas and A. J. Pinho, "A DNA Sequence Corpus for Compression Benchmark," *Practical Applications of Computational Biology and Bioinformatics*, vol. 803, pp. 208-215, 2019.
